# Supplementary material for: De Novo Transcriptome Assembly and Comparative Analysis of Differentially Expressed Genes Involved in Cold Acclimation and Freezing Tolerance of the Arctic Moss Aulacomnium turgidum (Wahlenb.) Schwaegr
Source: MDPI journal article supplement (doi:10.3390/plants12061250), 2023-03-09
Supplement: s1 [file s1]

| (A) Starch and maltose |             | Up-regulated unigene from CA |                             |         |                  |
|------------------------|-------------|------------------------------|-----------------------------|---------|------------------|
| Function               | Enzyme name | Unigene No.                  | Average of expression value |         | log2 Fold Change |
|                        |             |                              | NA-12                       | CA-12   |                  |
| Synthesis              | SS          | unigene_02205                | 0.18                        | 5.31    | 5.13             |
|                        |             | unigene_14682                | 5.13                        | 32.66   | 2.88             |
|                        | SBE         | unigene_11066                | 30.71                       | 130.18  | 2.29             |
| Decomposition          | GWD         | unigene_13228                | 4.59                        | 19.56   | 2.32             |
|                        |             | unigene_34485                | 58.58                       | 750.75  | 3.89             |
|                        | $\alpha$ AM | unigene_13443                | 6.90                        | 1462.61 | 7.94             |
|                        |             | unigene_24164                | 7.09                        | 149.12  | 4.61             |
|                        | $\beta$ AM  | unigene_15306                | 160.24                      | 1274.82 | 3.20             |
|                        |             | unigene_41589                | 39.69                       | 160.58  | 2.22             |

  

| (B) Glucose   |             | Up-regulated unigene from CA |                             |        |                  |
|---------------|-------------|------------------------------|-----------------------------|--------|------------------|
| Function      | Enzyme name | Unigene No.                  | Average of expression value |        | log2 Fold Change |
|               |             |                              | NA-12                       | CA-12  |                  |
| Decomposition | NIN         | unigene_39873                | 42.62                       | 234.22 | 2.67             |
|               | DPE1        | unigene_05326                | 28.95                       | 100.43 | 2.01             |
|               |             | unigene_23568                | 1.21                        | 38.22  | 5.19             |
| Transporter   | GLUT        | unigene_32381                | 39.64                       | 160.31 | 2.22             |
|               |             | unigene_32594                | 6.30                        | 75.68  | 3.81             |
|               |             | unigene_32989                | 1.17                        | 42.28  | 5.37             |

  

| (C) Sucrose    |             | Up-regulated unigene from CA |                             |        |                  |
|----------------|-------------|------------------------------|-----------------------------|--------|------------------|
| Function       | Enzyme name | Unigene No.                  | Average of expression value |        | log2 Fold Change |
|                |             |                              | NA-12                       | CA-12  |                  |
| Synthesis      | SPS         | unigene_05471                | 16.40                       | 134.84 | 3.25             |
| %Syn. or Deco. | SuSy        | unigene_34305                | 1.67                        | 168.73 | 6.87             |
|                |             | unigene_39191                | 15.77                       | 117.66 | 3.11             |
| Conversion     | SPP         | unigene_22087                | 16.76                       | 140.41 | 3.28             |
|                |             | unigene_23848                | 7.00                        | 75.94  | 3.66             |
| Transporter    | SUT         | unigene_05657                | 24.55                       | 162.52 | 2.94             |
|                |             | unigene_07358                | 15.60                       | 105.57 | 2.98             |
|                |             | unigene_19674                | 28.49                       | 212.78 | 3.11             |
|                |             | unigene_22087                | 16.76                       | 140.41 | 3.28             |
|                |             | unigene_23848                | 7.00                        | 75.94  | 3.66             |
|                |             | unigene_37984                | 15.08                       | 66.21  | 2.35             |
| Decomposition  | NIN         | unigene_39873                | 42.62                       | 234.22 | 2.67             |

  

| (D) Fructose   |             | Up-regulated unigene from CA |                             |        |                  |
|----------------|-------------|------------------------------|-----------------------------|--------|------------------|
| Function       | Enzyme name | Unigene No.                  | Average of expression value |        | log2 Fold Change |
|                |             |                              | NA-12                       | CA-12  |                  |
| Decomposition  | NIN         | unigene_39873                | 42.62                       | 234.22 | 2.67             |
| Transporter    | SDH         | unigene_16245                | 0.41                        | 9.24   | 4.69             |
|                |             | unigene_28068                | 9.24                        | 34.89  | 2.12             |
| Conversion     | FK          | unigene_01128                | 28.92                       | 104.95 | 2.07             |
|                |             | unigene_25770                | 16.63                       | 47.92  | 1.75             |
|                |             | unigene_34353                | 11.90                       | 54.30  | 2.40             |
|                |             | unigene_43437                | 2.54                        | 27.03  | 3.61             |
| %Syn. or Deco. | SuSy        | unigene_34305                | 1.67                        | 168.73 | 6.87             |
|                |             | unigene_39191                | 15.77                       | 117.66 | 3.11             |

**Figure S1.** Lists of unigenes related to the synthesis, decomposition, conversion, and transport of starch, maltose, glucose, fructose, and sucrose. In the log<sub>2</sub> fold change column, red indicates the highest value and white indicates the lowest value. CA-12, *A. turgidum* protonema were cold-acclimated at 4 °C for 2 days and exposed to freezing until -12 °C; NA-12, *A. turgidum* protonema were non-acclimated at 25 °C for 2 days and exposed to freezing until -12 °C.

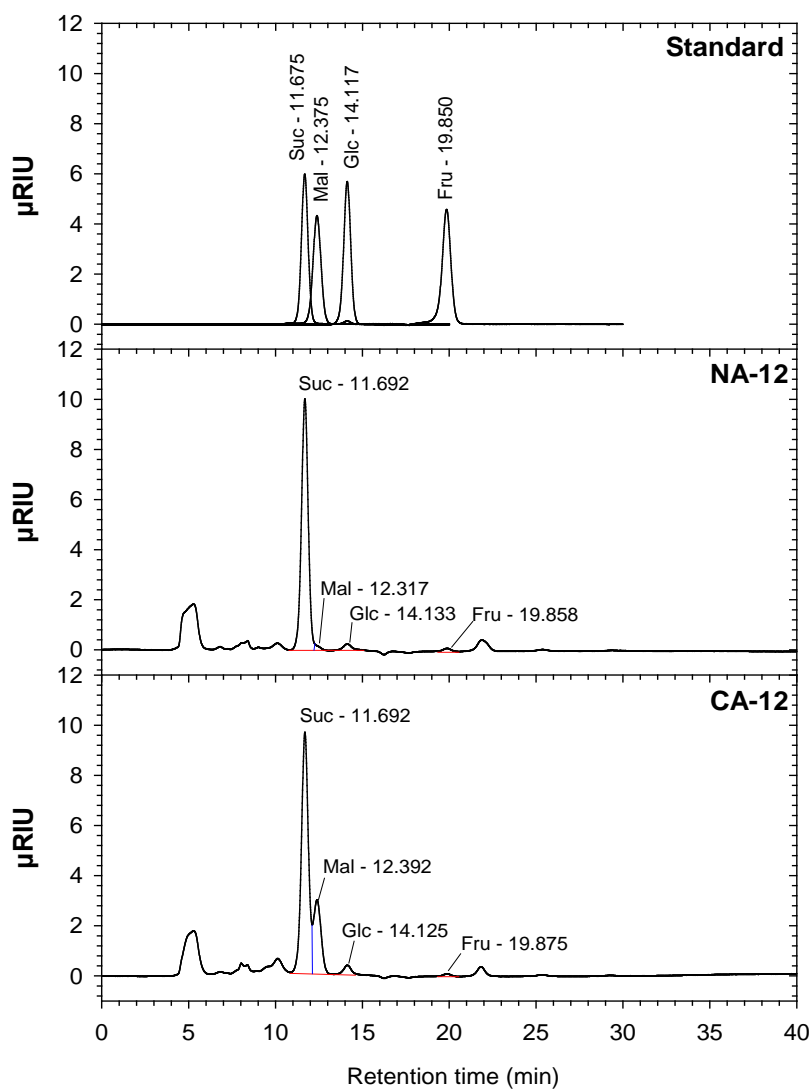

**Figure S2.** Chromatograms of sugars for standards, NA-12 and CA-12 using HPLC-RI. Soluble sugars were separated using a Aminex 87P ion exclusion column at a flow rate of 0.5 mL/min. Distilled water was used as a mobile phase. NA-12, *A. turgidum* protonema were non-acclimated at 25 °C for 2 days and exposed to freezing until -12 °C; CA-12, *A. turgidum* protonema were cold-acclimated at 4 °C for 2 days and exposed to freezing until -12 °C; Suc; sucrose, Mal; maltose, Glc; glucose, Fru; fructose.
